# Supplementary material for: Genomic Organization of Repetitive DNA Elements and Extensive Karyotype Diversity of Silurid Catfishes (Teleostei: Siluriformes): A Comparative Cytogenetic Approach
Source: MDPI journal article supplement (doi:10.3390/ijms20143545), 2019-07-19
Supplement: s1 [file s1]

## Supplementary

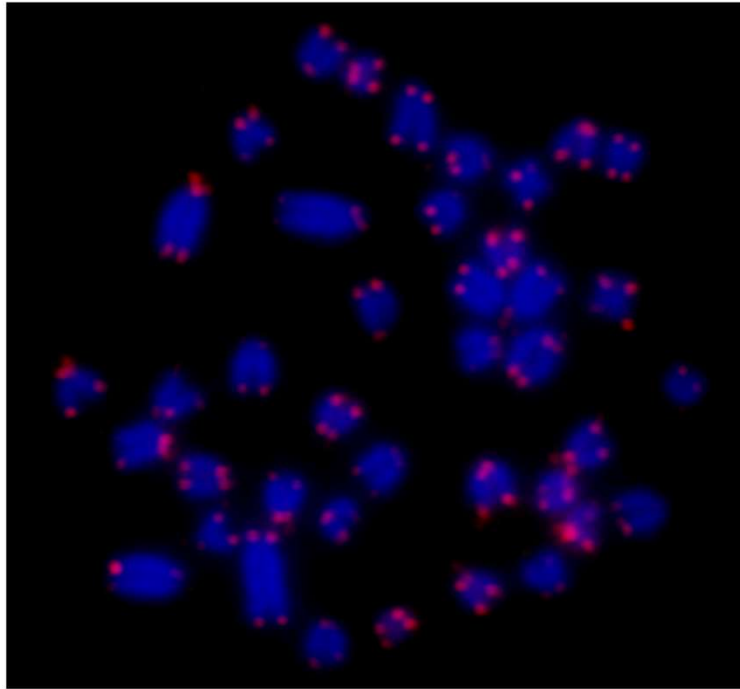

**Figure S1.** Metaphase plates of *Silurichthys phaiosoma* showing the location of telomeric (TTAGGG)*n* repeats. Bar = 5  $\mu$ m.
